# Supplementary material for: New application of AIEgens realized in photodetectors: reduced work function of transparent electrodes and much improved performance
Source: Royal Society of Chemistry journal article supplement (doi:10.1039/c7qm00404d), 2017-10-10
Supplement: c7qm00404d1.pdf [file c7qm00404d1.pdf]

# Electronic Supplementary Information

## The new application of AIEgens realized in photodetectors: reduced work function of transparent electrodes, and much improved performance

Lei Feng, Can Wang, Xianyu Deng\*, Xincheng Miao, Jiaqiang Wang, Yangyang Wang, Zhen Li\*

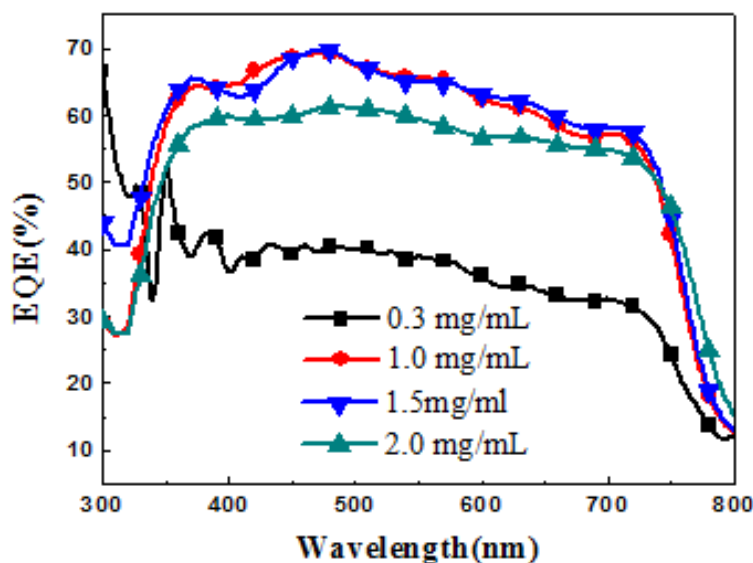

**Figure S1.** The EQE of the photodetectors with the ITO modification by different concentration of WC-1 solution.

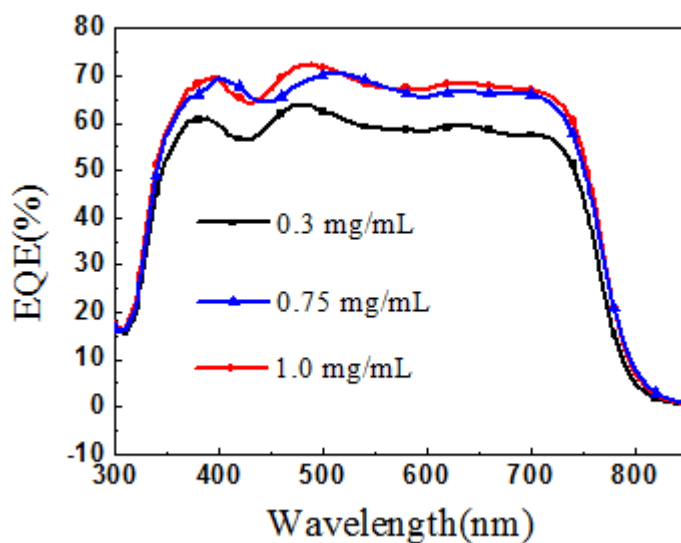

**Figure S2.** The EQE of the photodetectors with the ITO modification by different concentration of WC-2 solution.
